# Supplementary material for: High-Intensity Focused Ultrasound Induces Adipogenesis via Control of Cilia in Adipose-Derived Stem Cells in Subcutaneous Adipose Tissue
Source: MDPI journal article supplement (doi:10.3390/ijms23168866), 2022-08-09
Supplement: s1 [file s1]

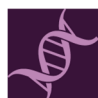

## Supplementary Tables

**Table S1.** Temperature according to HIFU applied energy

| J   | °C   |
|-----|------|
| 0.2 | 40   |
| 0.3 | 42.7 |
| 0.4 | 47.2 |
| 0.5 | 49.4 |
| 0.6 | 54.1 |
| 0.7 | 58.1 |
| 0.8 | 60.7 |
| 0.9 | 63.5 |
| 1   | 66.3 |

**Table S2.** List of antibodies used for immunohistochemistry and immunofluorescence

| Antigen<br>(host)          | Company                      | Dilution rate        |                    |
|----------------------------|------------------------------|----------------------|--------------------|
|                            |                              | Immunohistochemistry | Immunofluorescence |
| HSP70<br>(rabbit)          | Cell Signaling<br>Technology | 1 : 200              |                    |
| NF- $\kappa$ B<br>(rabbit) | Cell Signaling<br>Technology | 1 : 400              |                    |
| IL-6<br>(rabbit)           | Abcam                        | 1 : 100              |                    |
| TNF- $\alpha$<br>(rabbit)  | Novus biologicals            | 1 : 200              |                    |
| CD166<br>(mouse)           | HUABIO                       |                      | 1 : 50             |
| AurA<br>(rabbit)           | Fine Test                    |                      | 1 : 100            |
| HDAC6<br>(rabbit)          | Abclonal                     |                      | 1 : 100            |
| Arl13b<br>(rabbit)         | Proteintech                  |                      | 1 : 50             |

**Table S3.** List of antibodies used for western blot

| Antigen<br>(host)               | Company                      | Dilution rate |
|---------------------------------|------------------------------|---------------|
| PLK1<br>(rabbit)                | Cell Signaling<br>Technology | 1 : 1,000     |
| KIF3a<br>(rabbit)               | Affinity                     | 1 : 1,000     |
| IFT88<br>(rabbit)               | Affinity                     | 1 : 1,000     |
| WNT5A<br>(rabbit)               | Invitrogen                   | 1 : 1,000     |
| $\beta$ -catenin<br>(mouse)     | Santa cruz<br>biotechnology  | 1 : 300       |
| p- $\beta$ -catenin<br>(rabbit) | Cell Signaling<br>Technology | 1 : 1,000     |
| $\beta$ -actin<br>(rabbit)      | Cell Signaling<br>Technology | 1 : 1,000     |
